# Supplementary material for: Differential requirements for the EF-hand domains of human centrin 2 in primary ciliogenesis and nucleotide excision repair
Source: Oxford University Press journal article supplement (doi:10.1242/jcs.228486), 2019-09-06
Supplement: jcs228486supp.pdf [file jcs228486supp.pdf]

**A**

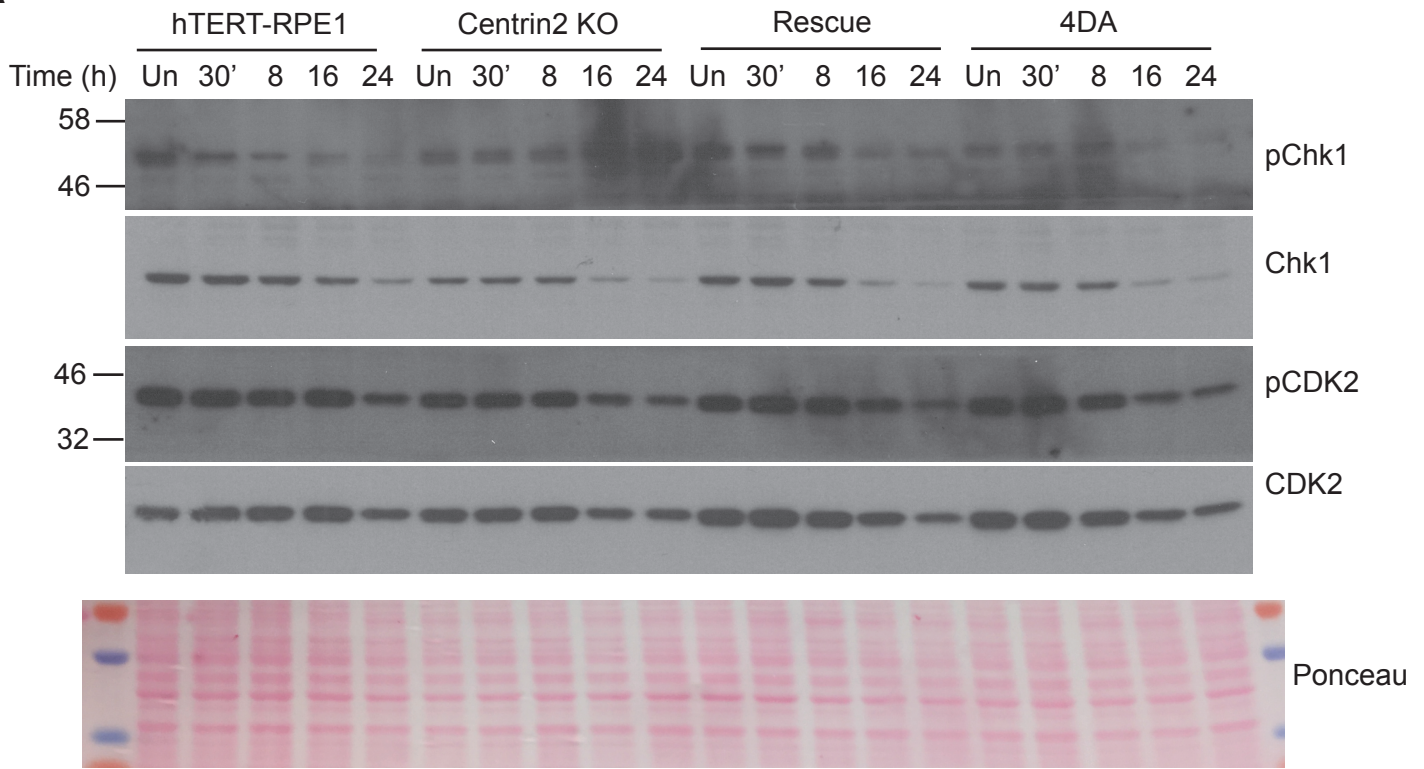

**B**

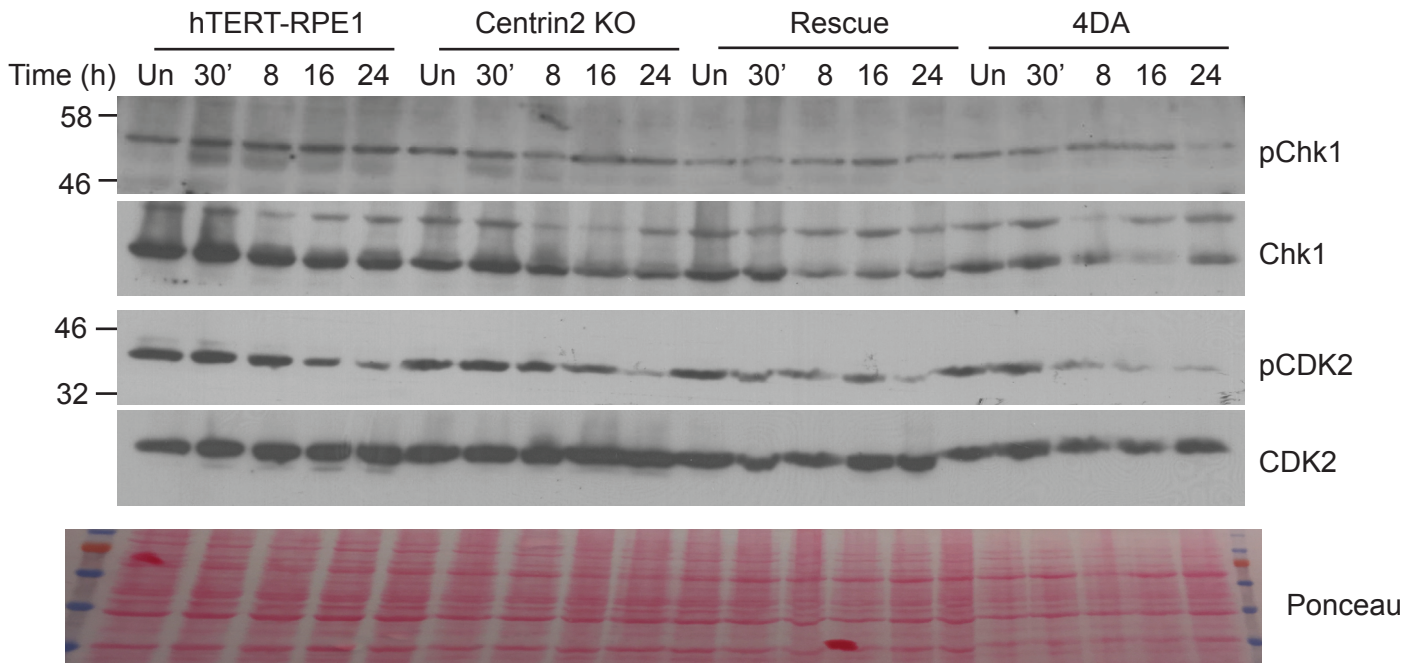

## Supplementary Data

### Figure S1

**A.** Immunoblot analysis of Chk1 and CDK2 phosphorylation in cells of the indicated genotype after IR treatment. Cells were treated with 5 Gy IR and CHK1 phosphorylation was visualised using anti-phospho-Chk1 S345 over the indicated timecourse. A blot for total Chk1 was used as a loading control. CDK2 phosphorylation was visualized with anti-phospho-CDK2 T160 and anti-CDK2. Ponceau was used as a loading control. Size markers are in kDa. Un, untreated control.

**B.** Immunoblot analysis of Chk1 and CDK2 phosphorylation in response to UV irradiation. Cells were treated with 5 J/m<sup>2</sup> UV treatment and analysed as for **A.**
